# Supplementary material
Source: PubMed Central journal article supplement (PMC5705174)
Supplement: NIHMS630675-supplement-Supplemental_Material.pdf [file NIHMS630675-supplement-Supplemental_Material.pdf]

## Supplementary Online Content

Shear MK, Wang Y, Skritskaya N, Duan N, Mauro C, Ghesquiere A. Treatment of complicated grief in elderly persons: a randomized clinical trial. *JAMA Psychiatry*. Published online September 24, 2014. doi:10.1001/jamapsychiatry.2014.1242.

**eTable.** Summary of moderator analyses performed

This supplementary material has been provided by the authors to give readers additional information about their work.

**eTable. Summary of moderator analyses performed**

| Moderator                                               | $\chi^2$ Test Statistic | Degrees of Freedom | P Value |
|---------------------------------------------------------|-------------------------|--------------------|---------|
| White <sup>a</sup>                                      | 0.00                    | 1                  | .99     |
| Age                                                     | 0.01                    | 1                  | .94     |
| Education (4 Year degree or less vs. Postgraduate work) | 1.56                    | 1                  | .21     |
| Sex                                                     | 1.00                    | 1                  | .32     |
| Time Since the Loss <sup>b</sup>                        | 0.88                    | 1                  | .35     |
| Relationship to the Deceased <sup>b</sup>               | 1.97                    | 3                  | .58     |
| Antidepressant Medication Use                           | 0.12                    | 1                  | .73     |
| Anti-anxiety Medication Use                             | 2.04                    | 1                  | .15     |
| Current MDD                                             | 0.04                    | 1                  | .85     |
| Current PTSD                                            | 0.00                    | 1                  | .99     |
| Current Panic Disorder                                  | 0.01                    | 1                  | .93     |
| Generalized Anxiety Disorder (current)                  | 2.27                    | 1                  | .13     |
| MMSE total score                                        | 1.51                    | 1                  | .22     |
| Violent Death                                           | 0.55                    | 1                  | .46     |

<sup>a</sup> Logistic link with model based standard errors due to convergence issues with log link/empirical standard errors

<sup>b</sup> Logistic link used instead of log link due to convergence issues with log link
